# Supplementary material
Source: PubMed Central journal article supplement (PMC6214820)
Supplement: BLT-16-502_Supplementary_content.pdf [file BLT-16-502_Supplementary_content.pdf]

Online supplementary content

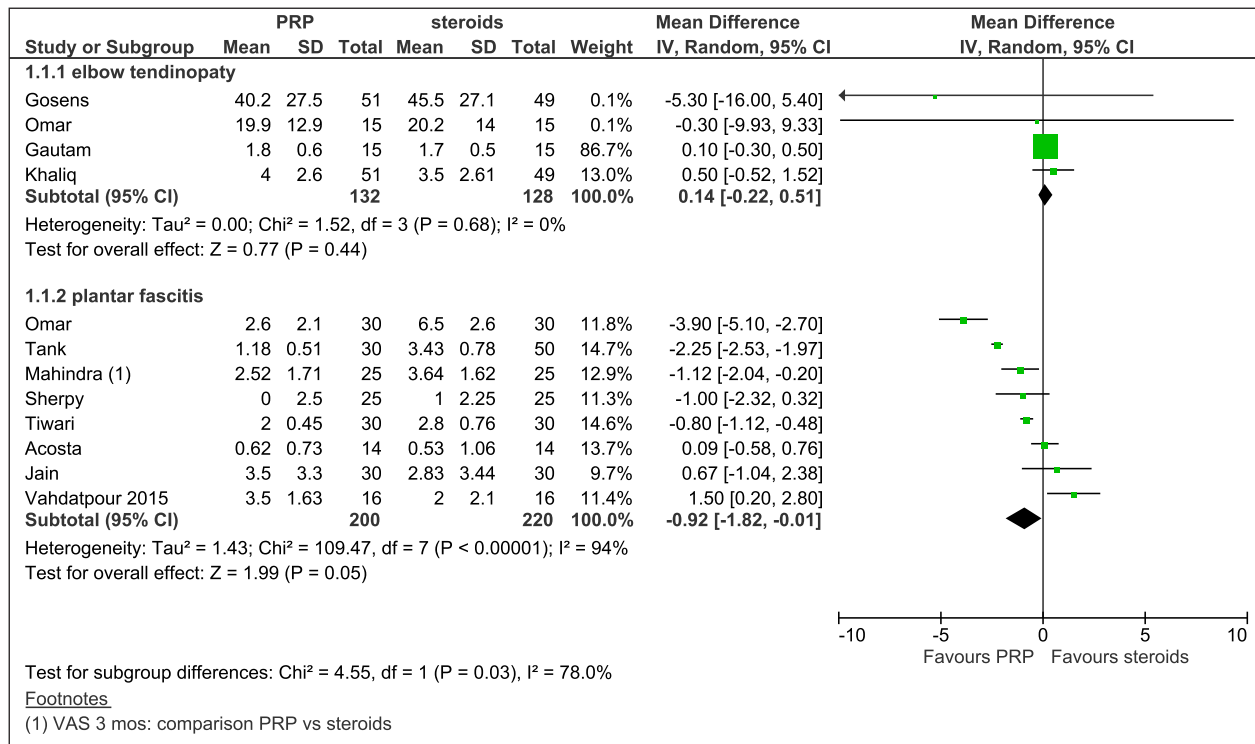

Figure S1 - Visual Analogue Score (VAS) at 3 months. Subgroup of studies with steroids injection as control. PRP: platelet-rich plasma.

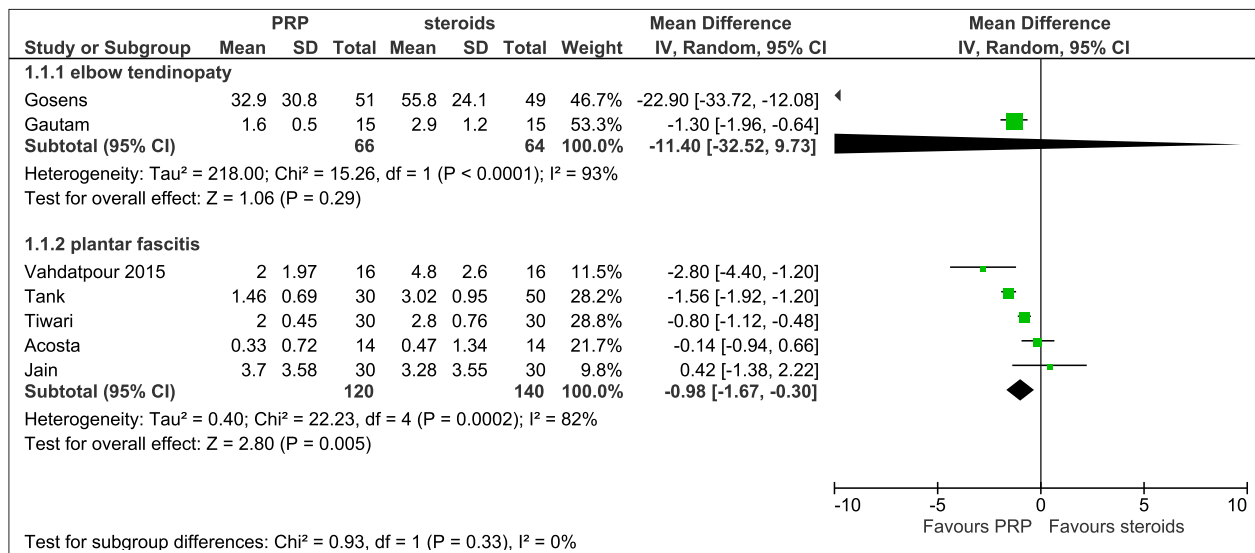

Figure S2 - Visual Analogue Score (VAS) at 6 months. Subgroup of studies with steroids injection as control. PRP: platelet-rich plasma.

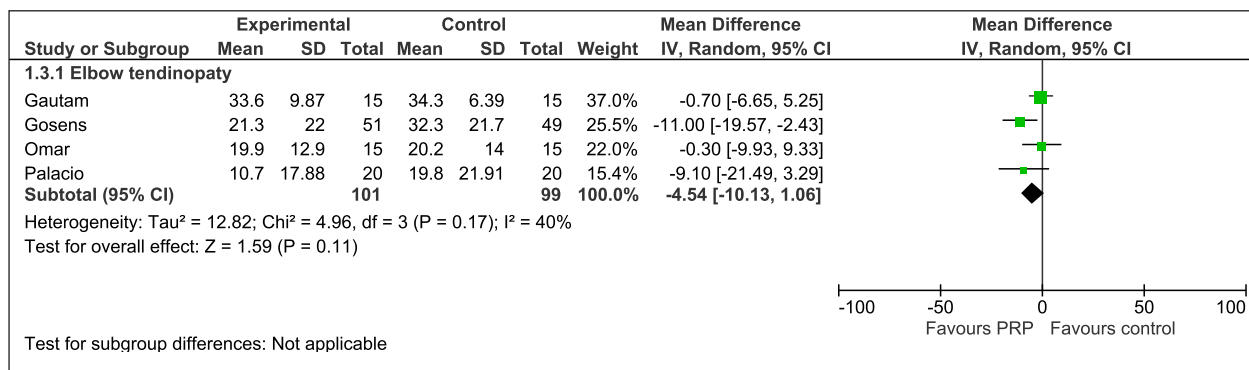

**Figure S3** - Forest plot of Disability of the Arm, Shoulder and Hand (DASH) score at 3 months.  
PRP: platelet-rich plasma.

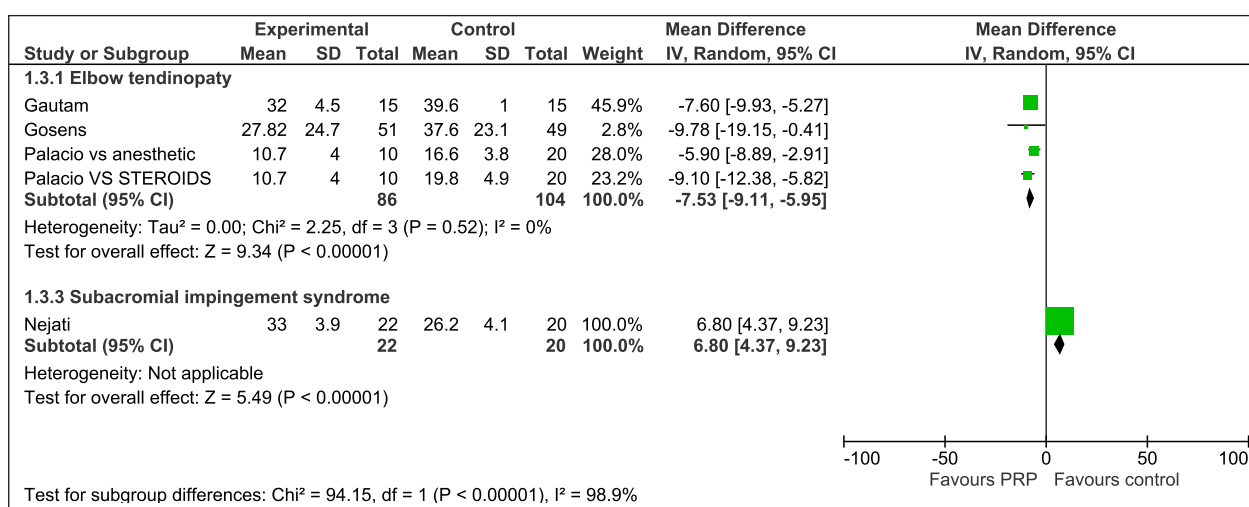

**Figure S4** - Forest plot of Disability of the Arm, Shoulder and Hand (DASH) score at 6 months.  
PRP: platelet-rich plasma.

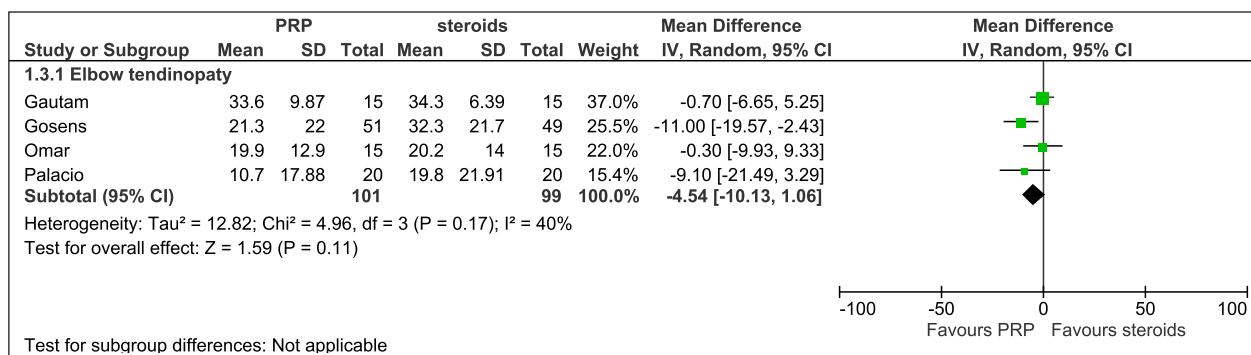

**Figure S5** - Disability of the Arm, Shoulder and Hand (DASH) score at 3 months. Subgroup of studies with steroids injection as control.  
PRP: platelet-rich plasma.

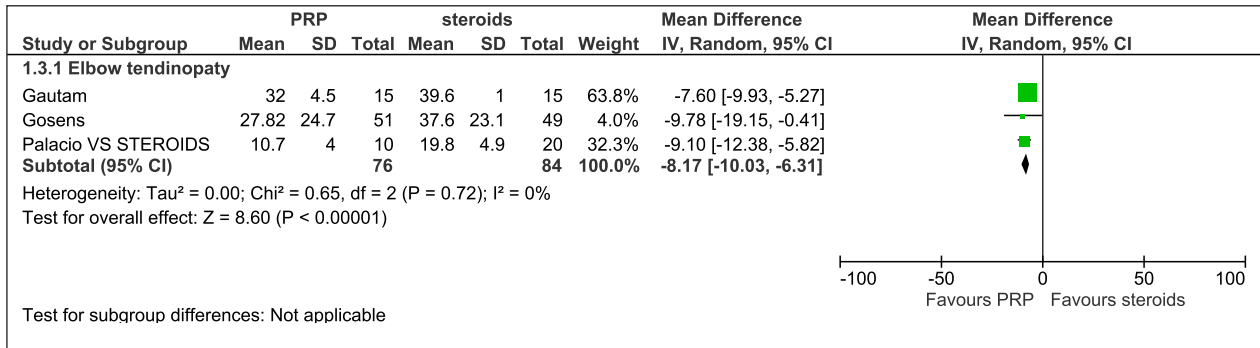

**Figure S6** - Disability of the Arm, Shoulder and Hand (DASH) score at 6 months. Subgroup of studies with steroids injection as control.  
PRP: platelet-rich plasma.

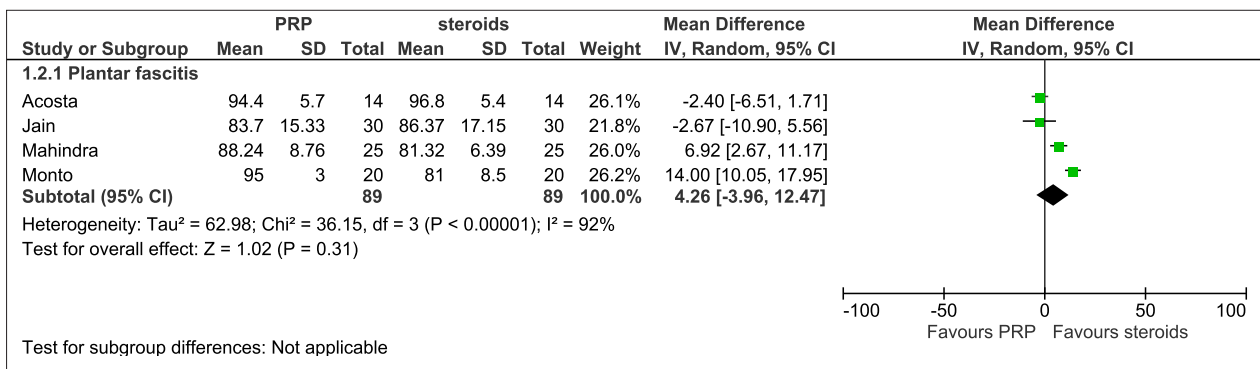

**Figure S7** - Forest plot of the American Orthopedic Foot and Ankle Society (AOFAS) score at 3 months.  
PRP: platelet-rich plasma.

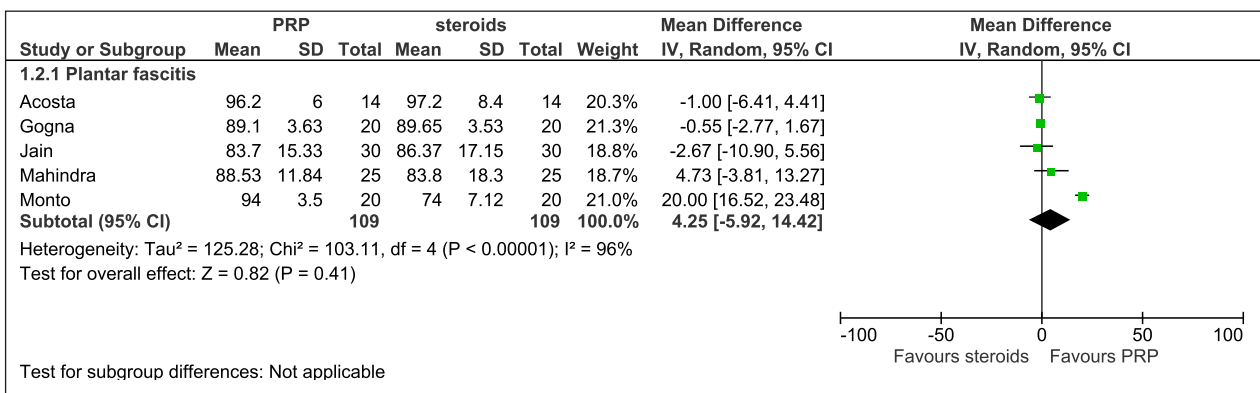

**Figure S8** - Forest plots of the American Orthopedic Foot and Ankle Society (AOFAS) score at 6 months.

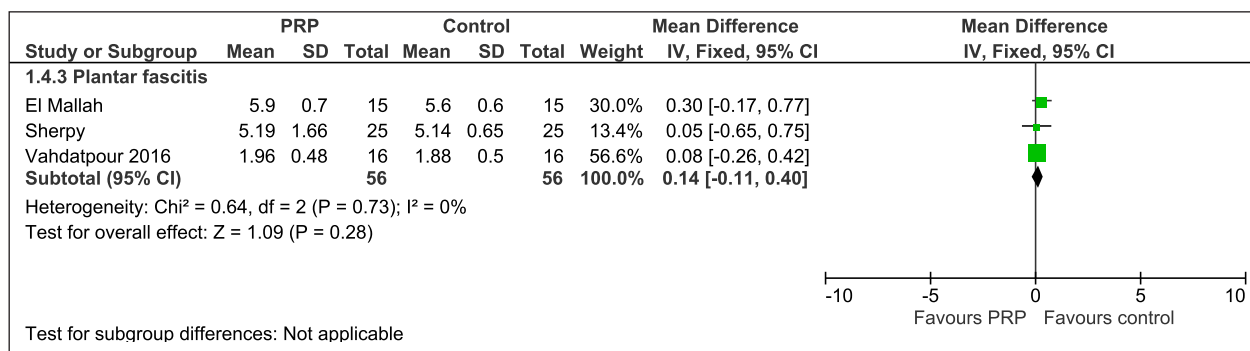

**Figure S9** - Forest plot of tendon thickness by ultrasound at 3 months. PRP: platelet-rich plasma.

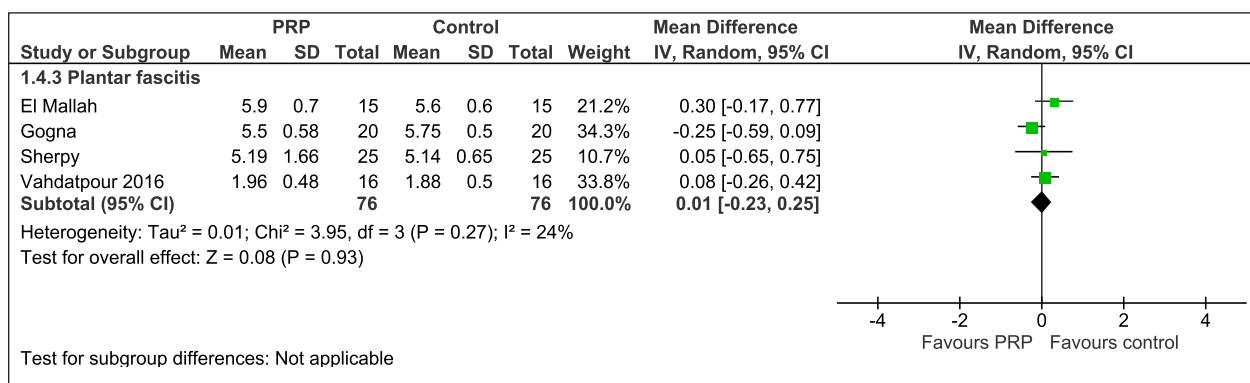

**Figure S10** - Forest plot of tendon thickness by ultrasound at 3 months. PRP: platelet-rich plasma.
